# Supplementary material for: Succinic semialdehyde derived from the gut microbiota can promote the proliferation of adult T-cell leukemia/lymphoma cells
Source: PubMed Central journal article supplement — Heliyon. 2024 Oct 2;10(20):e38507. doi: 10.1016/j.heliyon.2024.e38507 (PMC11619966; doi:10.1016/j.heliyon.2024.e38507), 2024-10-02
Supplement: mmc4.pdf [file mmc4.pdf]

**A**Eubacterium\_R  
p=0.00387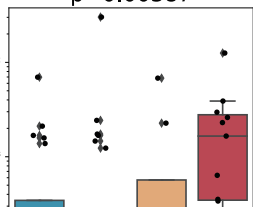Unassigned40  
p=0.0924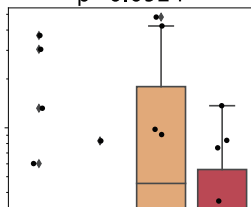Alistipes\_A  
p=0.202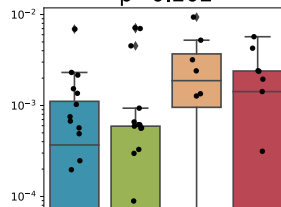Klebsiella  
p=0.0566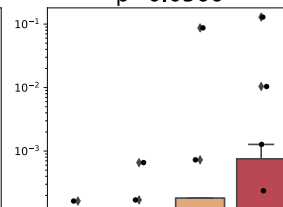Desulfovibrio  
p=0.0946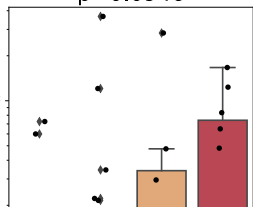Eubacterium\_G  
p=0.213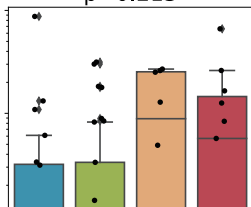Unassigned577  
p=0.0805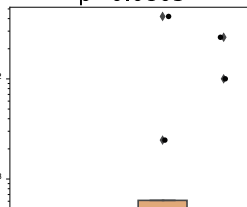

Relative abundance

Healthy Low-risk High-risk  
Carrier CarrierHealthy Low-risk High-risk  
Carrier CarrierHealthy Low-risk High-risk  
Carrier Carrier**B**

Eubacterium\_R

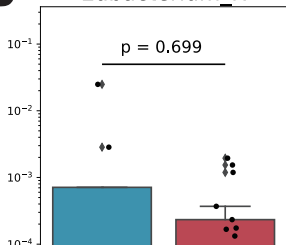

Unassigned40

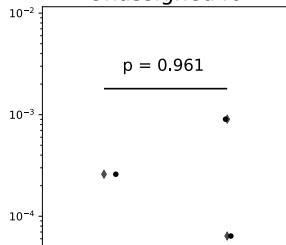

Alistipes\_A

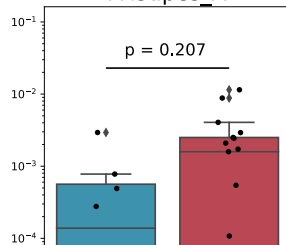

Klebsiella

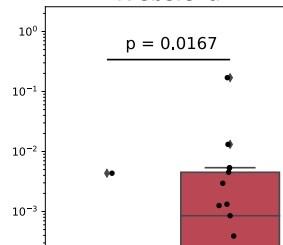

Desulfovibrio

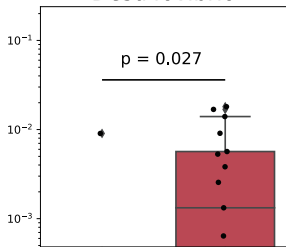

Eubacterium\_G

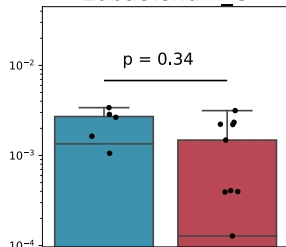

Unassigned577

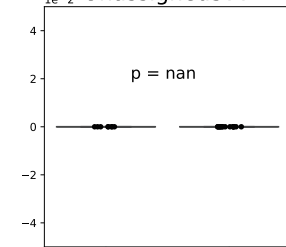

Relative abundance

Healthy ATL

Healthy ATL

Healthy ATL
