# Supplementary material for: Succinic semialdehyde derived from the gut microbiota can promote the proliferation of adult T-cell leukemia/lymphoma cells
Source: PubMed Central journal article supplement — Heliyon. 2024 Oct 2;10(20):e38507. doi: 10.1016/j.heliyon.2024.e38507 (PMC11619966; doi:10.1016/j.heliyon.2024.e38507), 2024-10-02

**A**

Coprococcus\_B  
 $\rho=0.771$   
 $R^2=0.916$

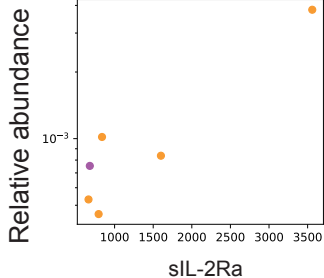

CAG-207  
 $\rho=0.7$   
 $R^2=0.648$

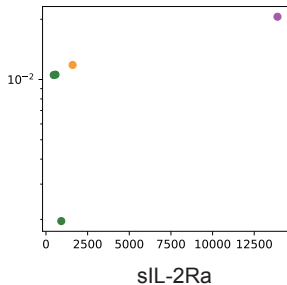

GCA-900066575  
 $\rho=0.543$   
 $R^2=0.494$

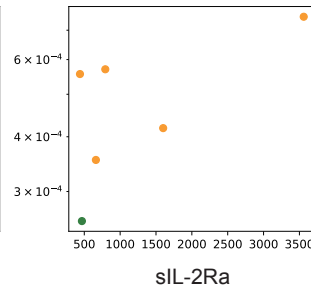

Enterobacter  
 $\rho=0.5$   
 $R^2=0.365$

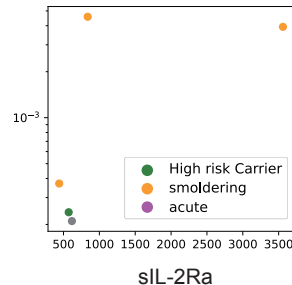**B**

UBA9475  
 $\rho=0.771$   
 $R^2=0.679$

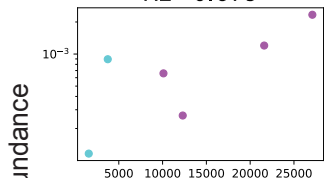

Lactobacillus  
 $\rho=0.771$   
 $R^2=0.537$

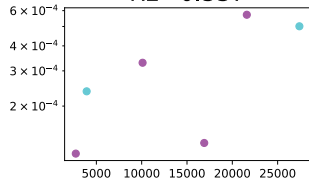

Ruminococcus\_E  
 $\rho=0.738$   
 $R^2=0.773$

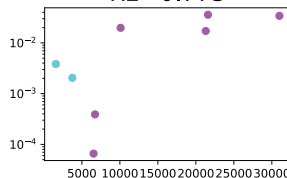

Eubacterium\_G  
 $\rho=0.733$   
 $R^2=0.591$

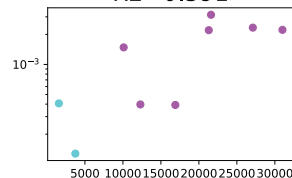

Unassigned501  
 $\rho=0.6$   
 $R^2=0.688$

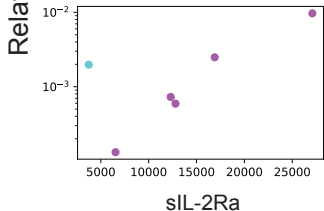

Bacteroides\_A  
 $\rho=0.587$   
 $R^2=0.442$

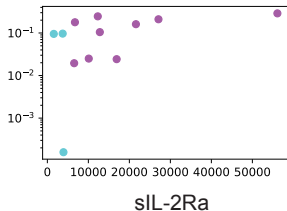

Clostridium\_A  
 $\rho=0.444$   
 $R^2=0.313$

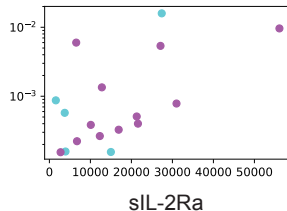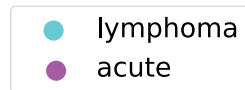

Supplement: mmc6.pdf [file mmc6.pdf]
