# Supplementary material for: Succinic semialdehyde derived from the gut microbiota can promote the proliferation of adult T-cell leukemia/lymphoma cells
Source: PubMed Central journal article supplement — Heliyon. 2024 Oct 2;10(20):e38507. doi: 10.1016/j.heliyon.2024.e38507 (PMC11619966; doi:10.1016/j.heliyon.2024.e38507), 2024-10-02
Supplement: mmc10.pdf [file mmc10.pdf]

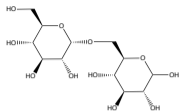

Isomaltose

①

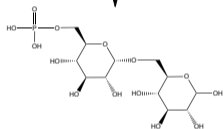

Isomaltose 6P

②

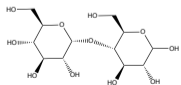

Maltose

Relative abundance

①

KO

$p = 0.0266$

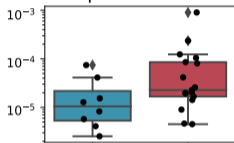

*Klebsiella*

$p = 0.0223$

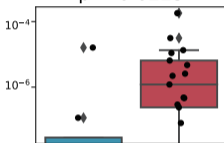

K02750  
alpha-glucoside PTS system EIICB component

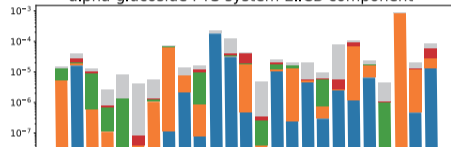

②

KO

$p = 0.00547$

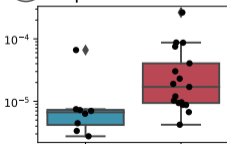

*Klebsiella*

$p = 0.0115$

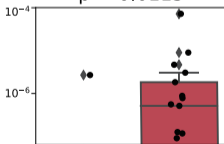

K01232  
maltose-6'-phosphate glucosidase

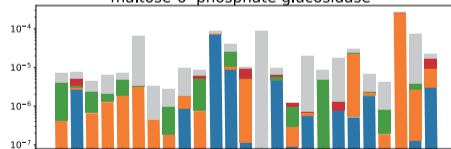

Healthy Control

ATL

others  
Enterobacter  
Faecalibacterium\_A  
Escherichia  
Klebsiella
