# Supplementary figures and images for: Succinic semialdehyde derived from the gut microbiota can promote the proliferation of adult T-cell leukemia/lymphoma cells
Source: PubMed Central journal article supplement — Heliyon. 2024 Oct 2;10(20):e38507. doi: 10.1016/j.heliyon.2024.e38507 (PMC11619966; doi:10.1016/j.heliyon.2024.e38507), 2024-10-02

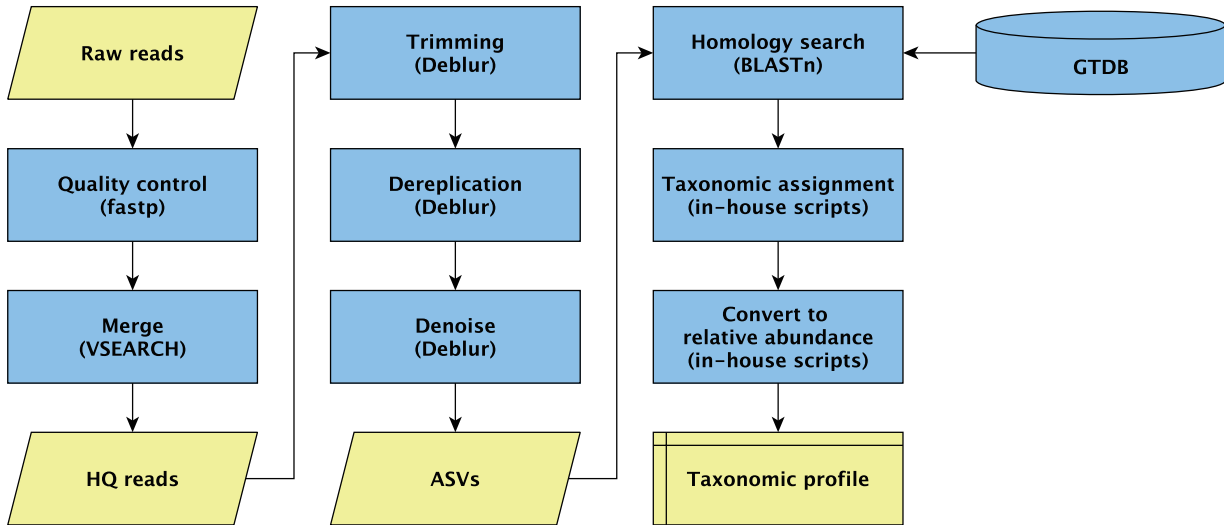

Supplement: mmc1.pdf [file mmc1.pdf]

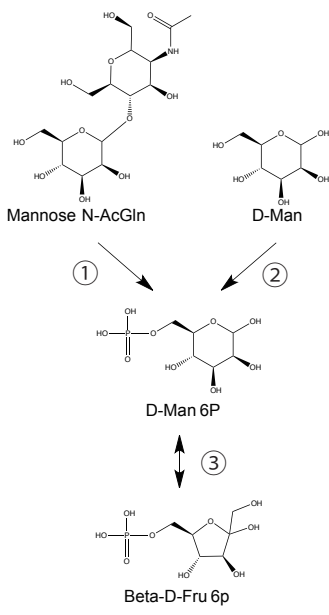

Relative abundance

①

②

③

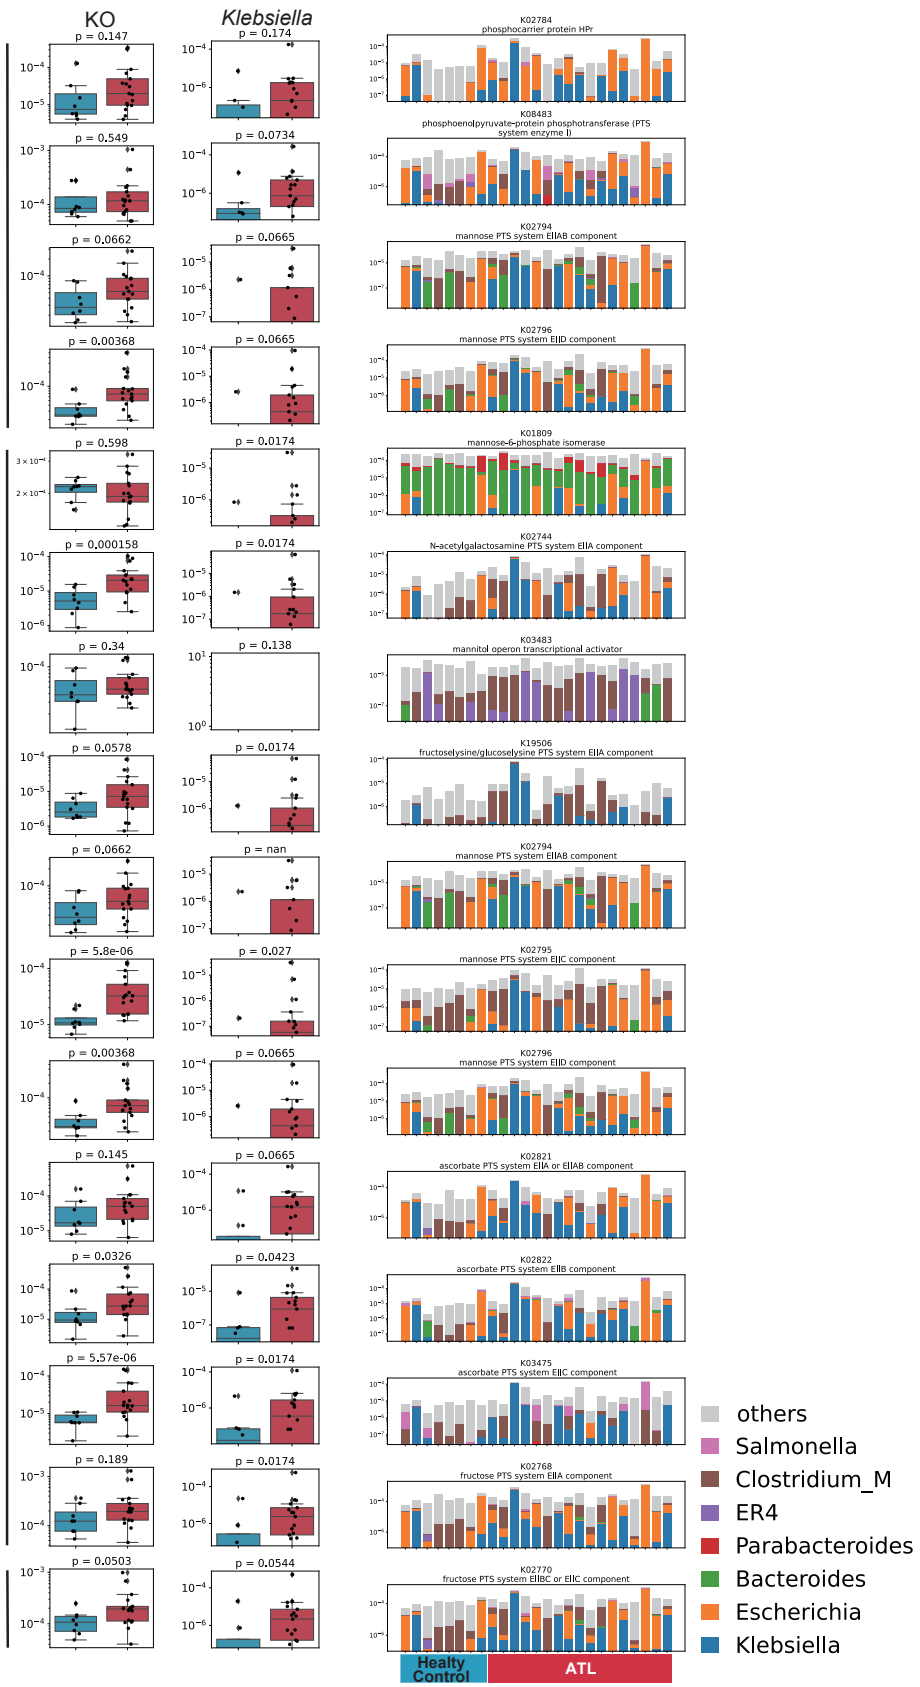

Supplement: mmc11.pdf [file mmc11.pdf]

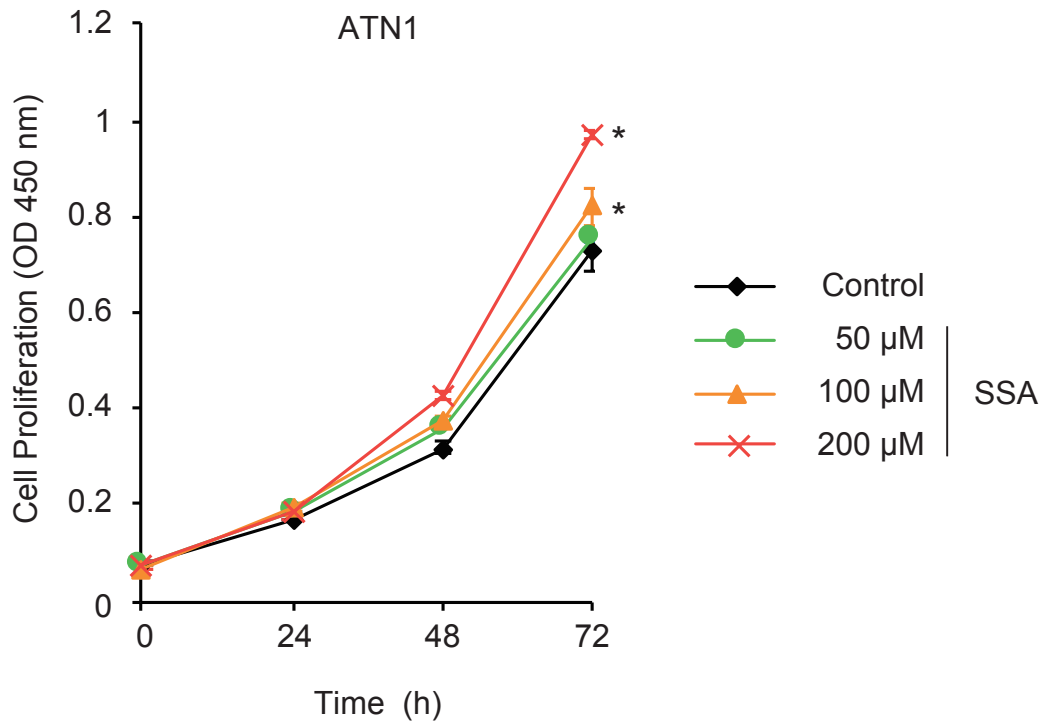

Supplement: mmc12.pdf [file mmc12.pdf]

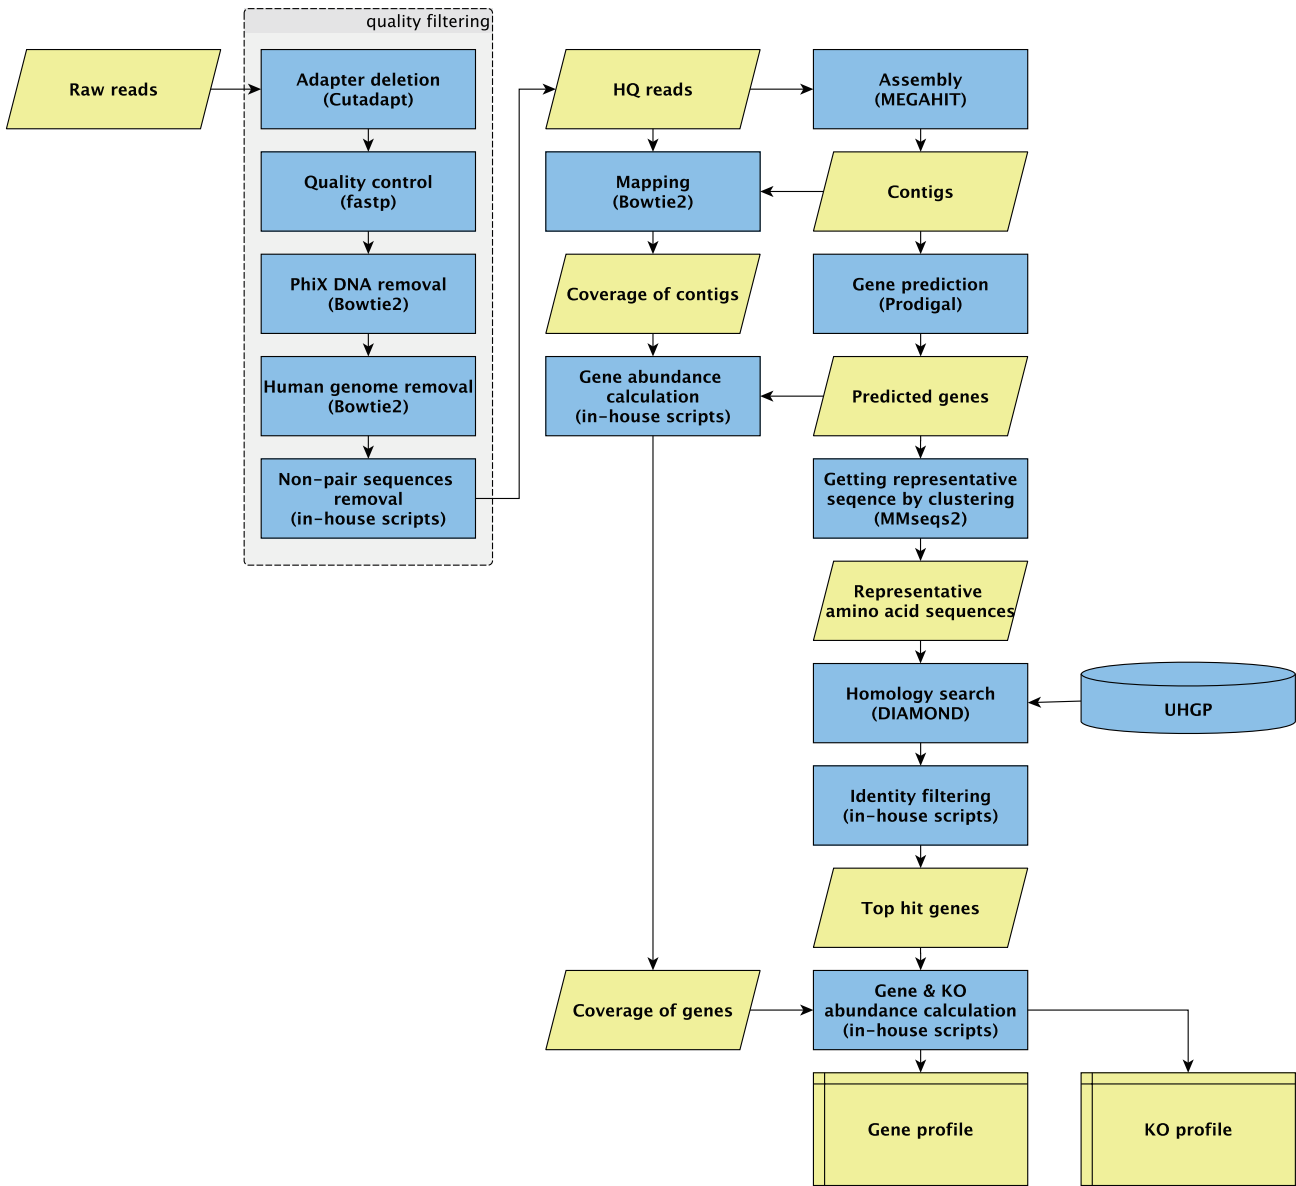

Supplement: mmc2.pdf [file mmc2.pdf]

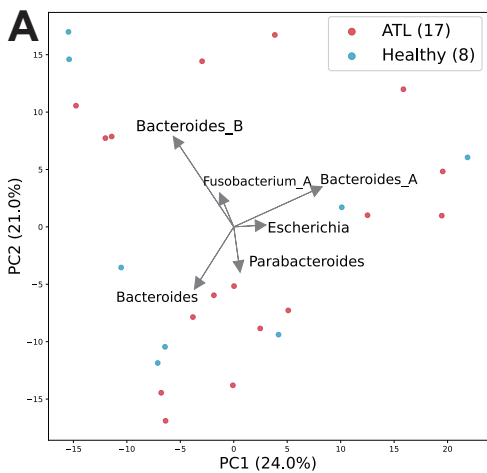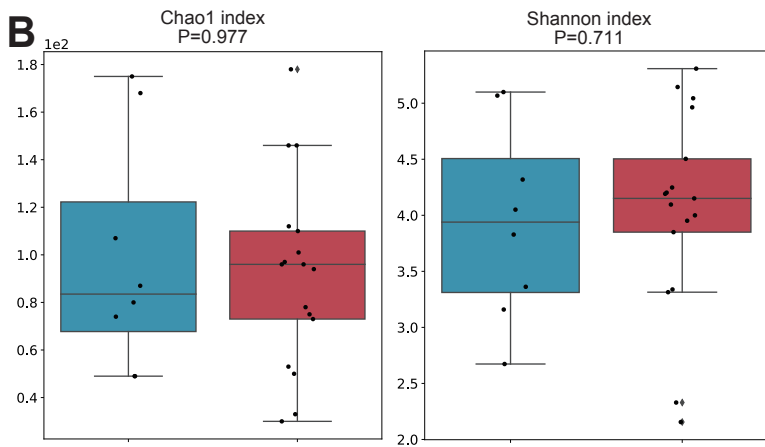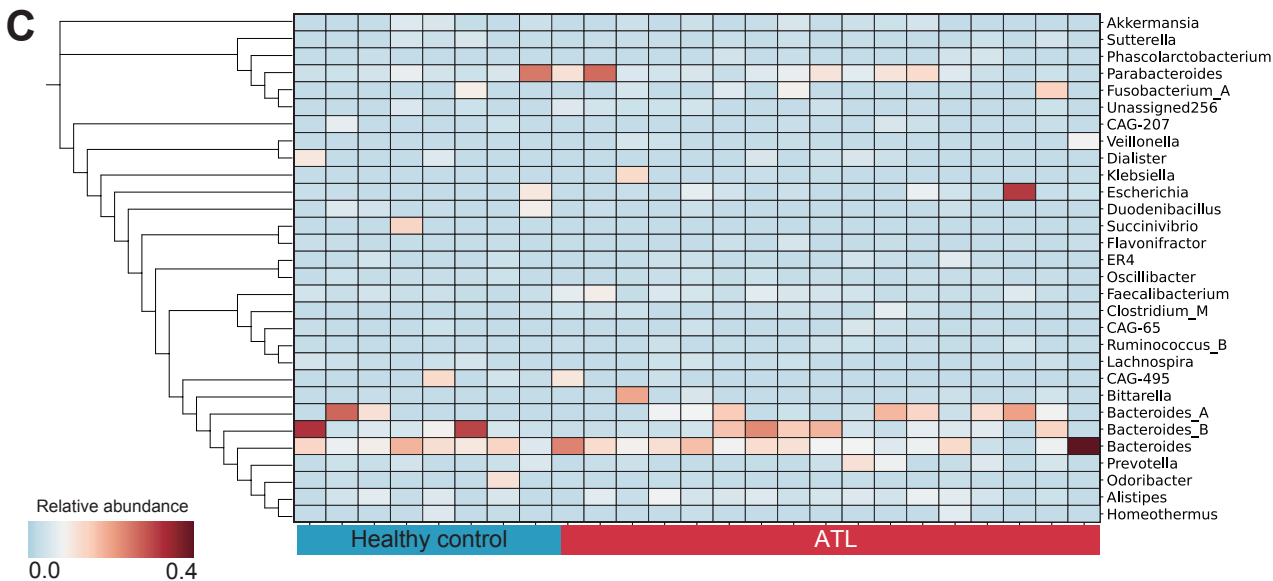

Supplement: mmc3.pdf [file mmc3.pdf]

**A**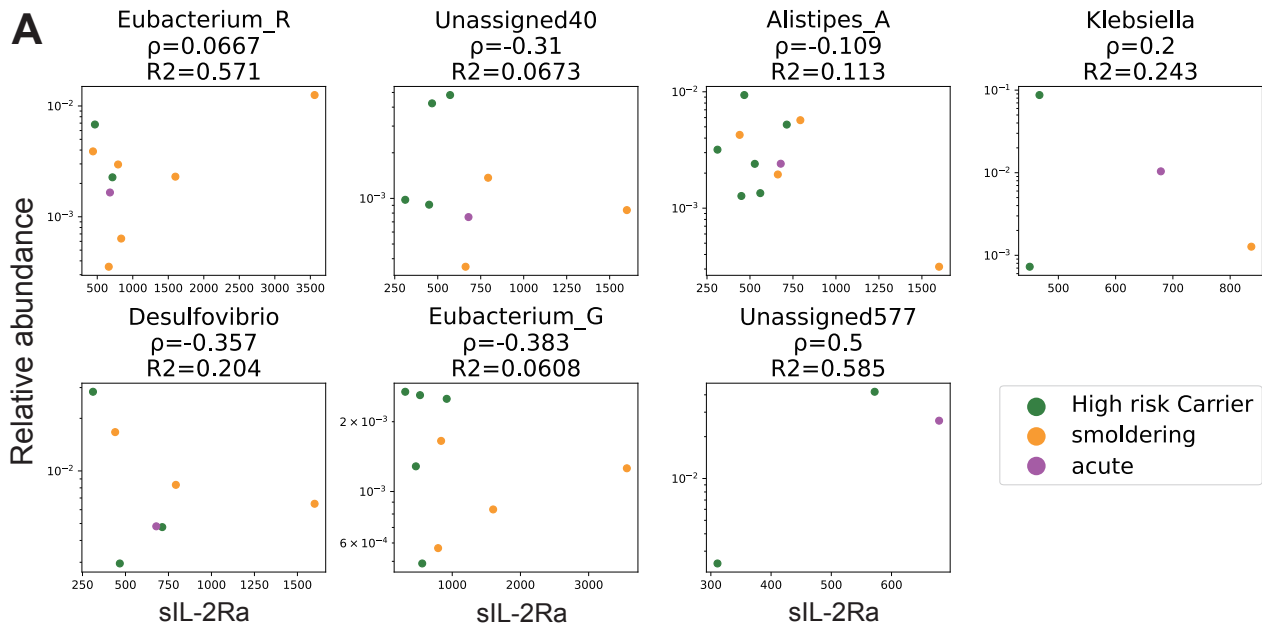**B**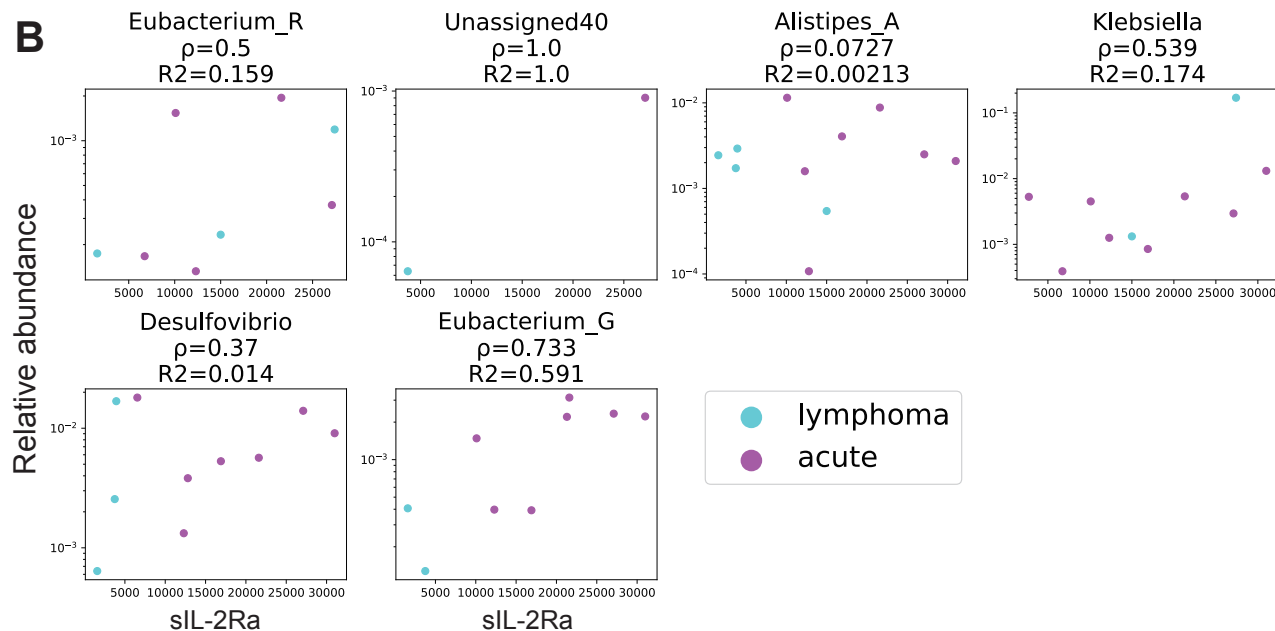

Supplement: mmc5.pdf [file mmc5.pdf]

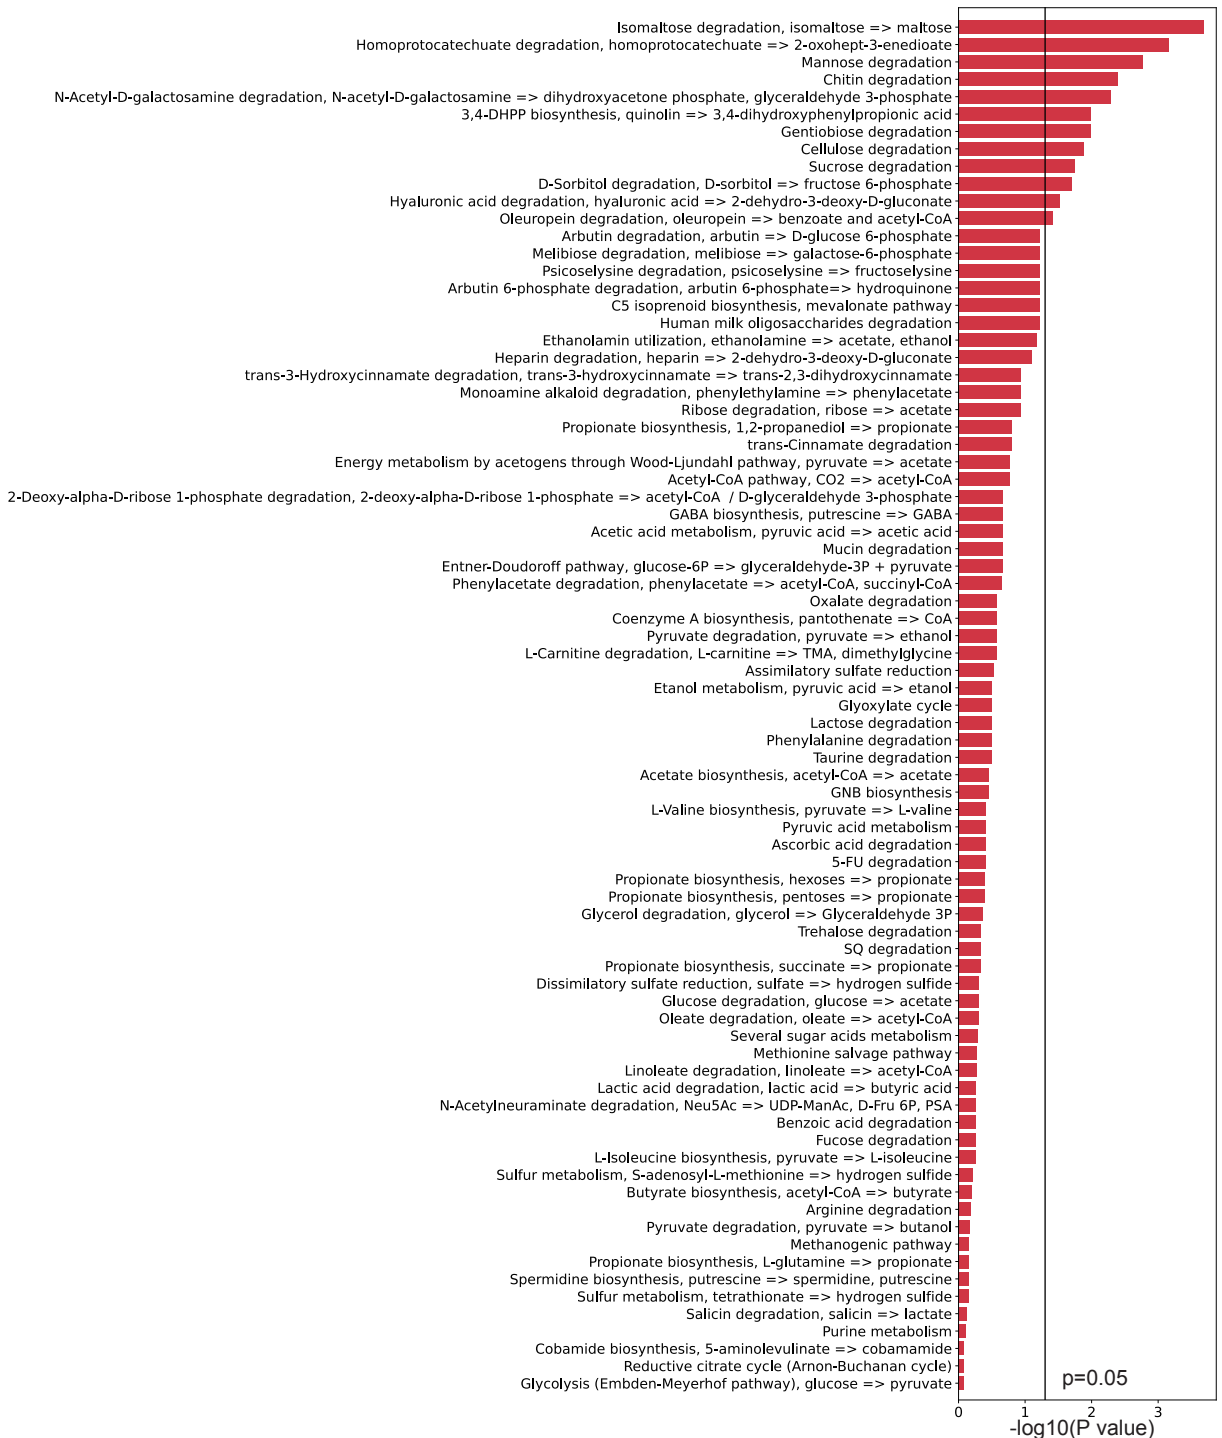

Supplement: mmc8.pdf [file mmc8.pdf]

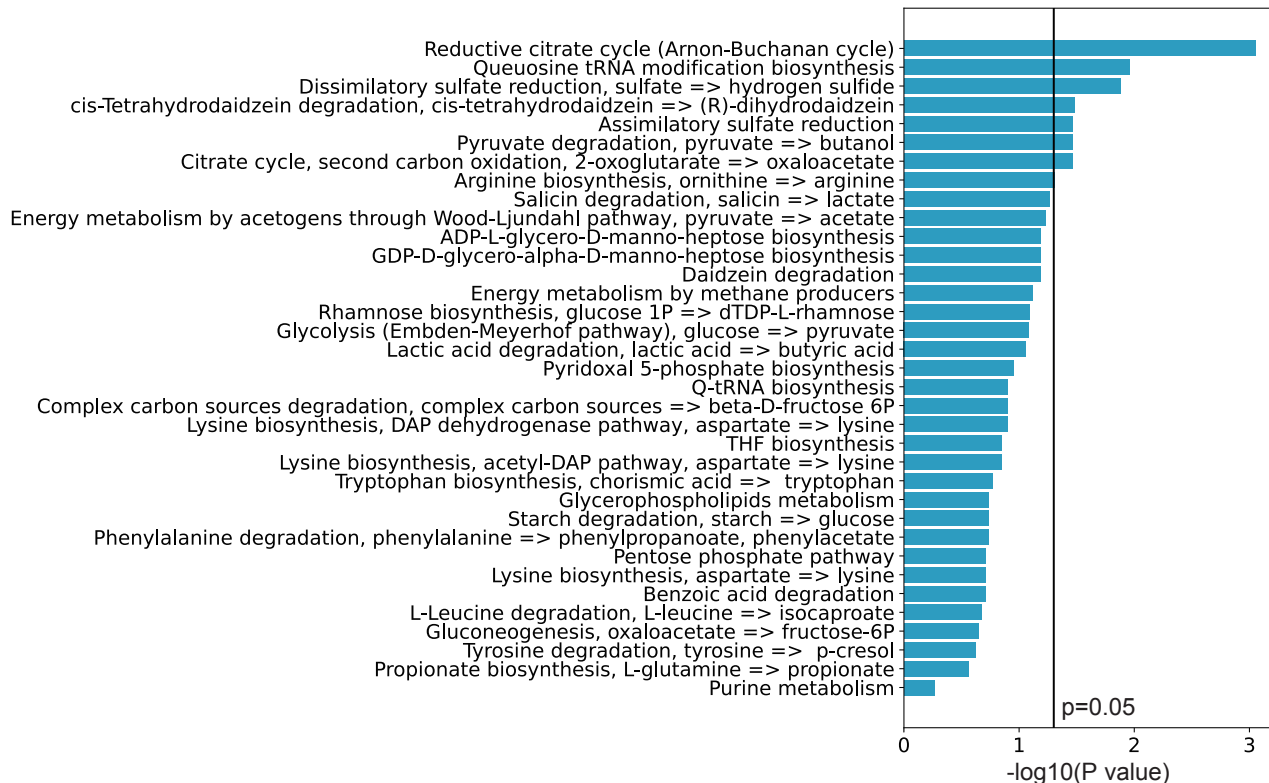

Supplement: mmc9.pdf [file mmc9.pdf]
